# Supplementary material for: Effects of Linseed Meal and Carotenoids from Different Sources on Egg Characteristics, Yolk Fatty Acid and Carotenoid Profile and Lipid Peroxidation
Source: MDPI journal article supplement (doi:10.3390/foods10061246), 2021-05-31
Supplement: s1 [file s1]

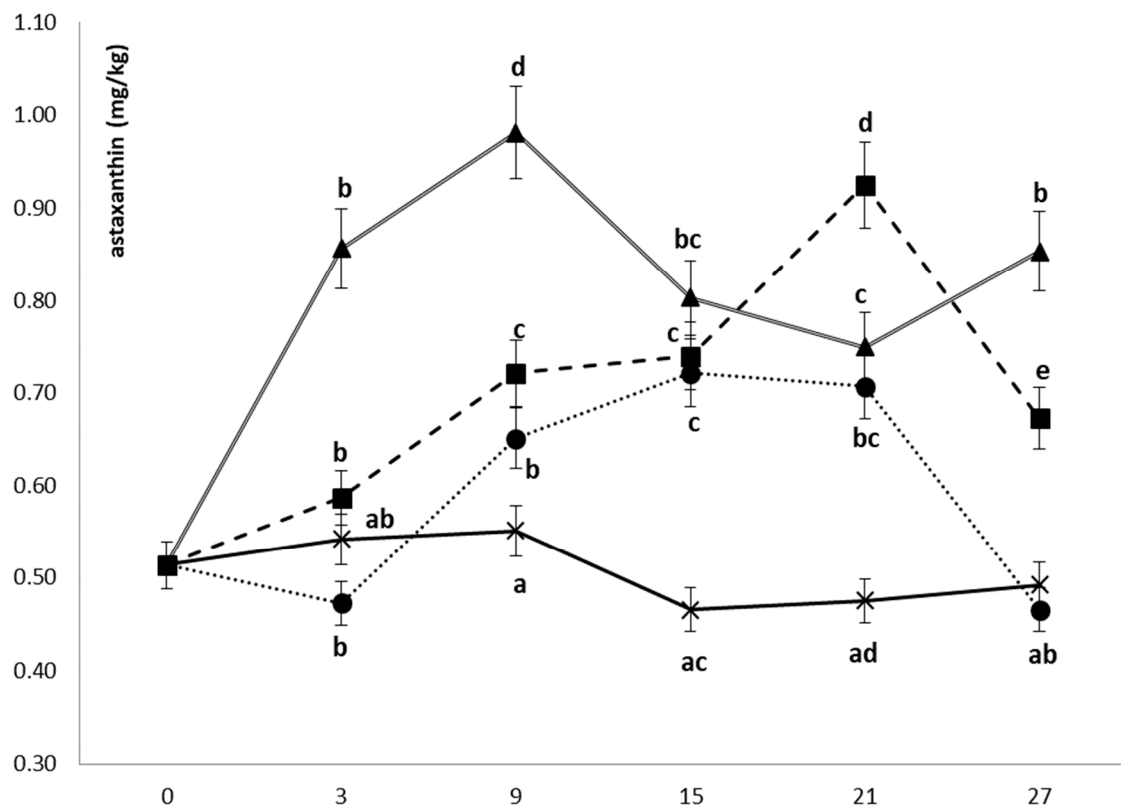

**Figure S1.** Time evolution (0–27 days) of yolk astaxanthin concentration according to the dietary treatments: control (●), experimental E1(■), experimental E2 (▲) and experimental E3 (×). C—control diet; E1—diet supplemented with 6% linseed meal + 2% dried kapia pepper; E2—diet supplemented with 6% linseed meal + 2% dried sea buckthorn pomace; E3—diet supplemented with 6% linseed meal + 2% dried carrot.

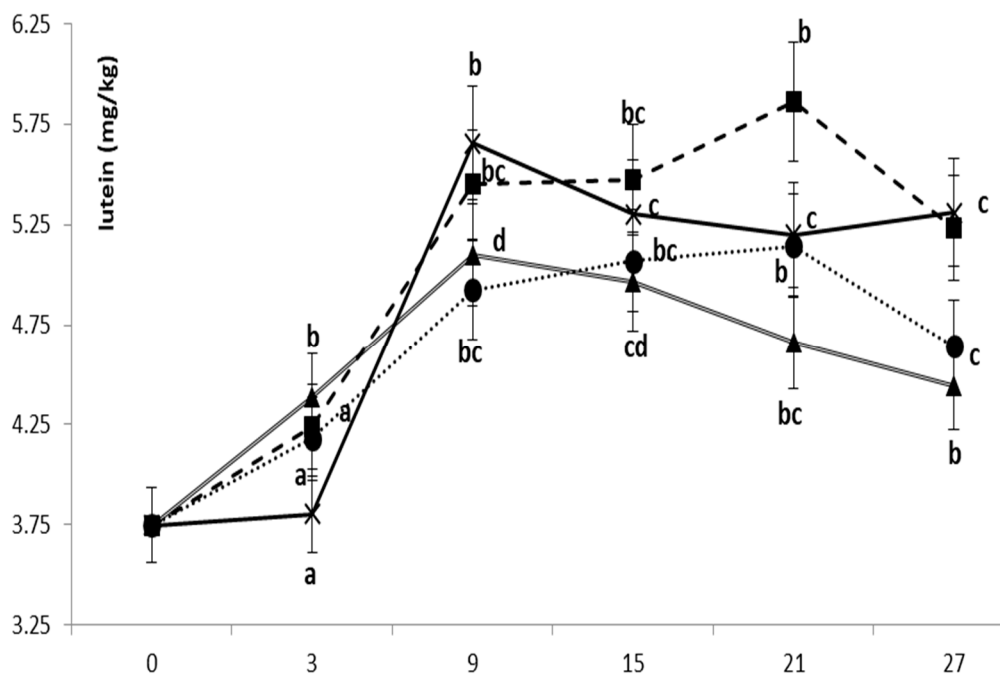

**Figure S2.** Time evolution (0–27 days) of yolk lutein concentration according to the dietary treatments: control (●), experimental E1(■), experimental E2 (▲) and experimental E3 (×). C—control diet; E1—diet supplemented with 6% linseed meal + 2% dried kapia pepper; E2—diet supplemented with 6% linseed meal + 2% dried sea buckthorn pomace; E3—diet supplemented with 6% linseed meal + 2% dried carrot.

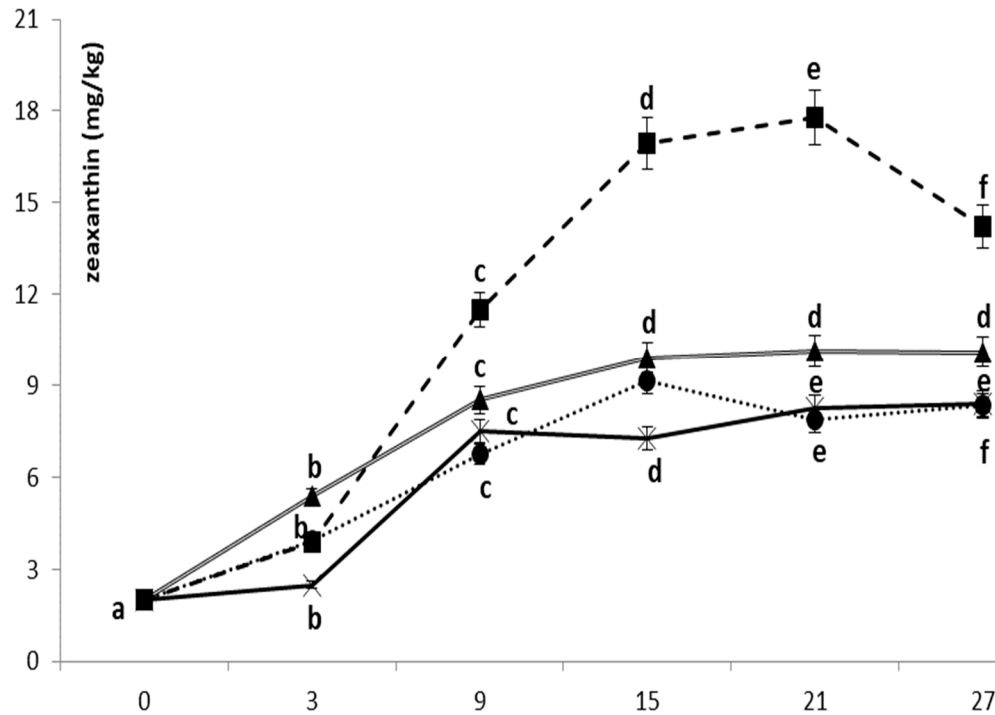

**Figure S3.** Time evolution (0–27 days) of yolk zeaxanthin concentration according to the dietary treatments: control (●), experimental E1 (■), experimental E2 (▲) and experimental E3 (×). C—control diet; E1—diet supplemented with 6% linseed meal + 2% dried kapia pepper; E2—diet supplemented with 6% linseed meal + 2% dried sea buckthorn pomace; E3—diet supplemented with 6% linseed meal + 2% dried carrot.

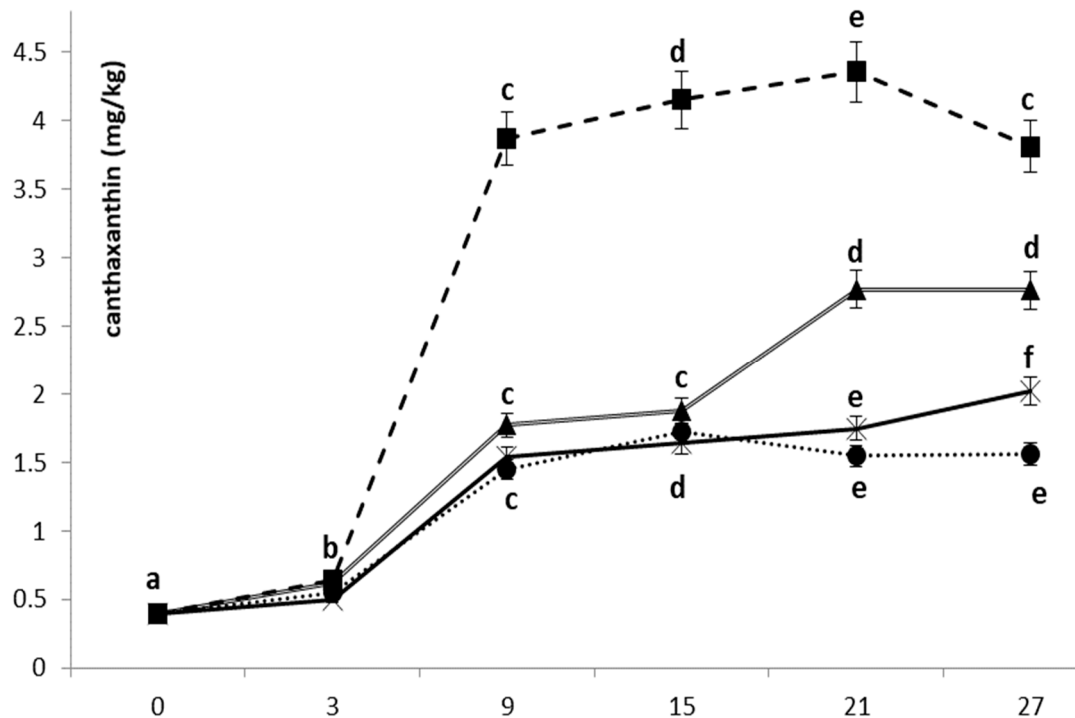

**Figure S4.** Time evolution (0–27 days) of yolk canthaxanthin concentration according to the dietary treatments: control (●), experimental E1 (■), experimental E2 (▲) and experimental E3 (×). C—control diet; E1—diet supplemented with 6% linseed meal + 2% dried kapia pepper; E2—diet supplemented with 6% linseed meal + 2% dried sea buckthorn pomace; E3—diet supplemented with 6% linseed meal + 2% dried carrot.

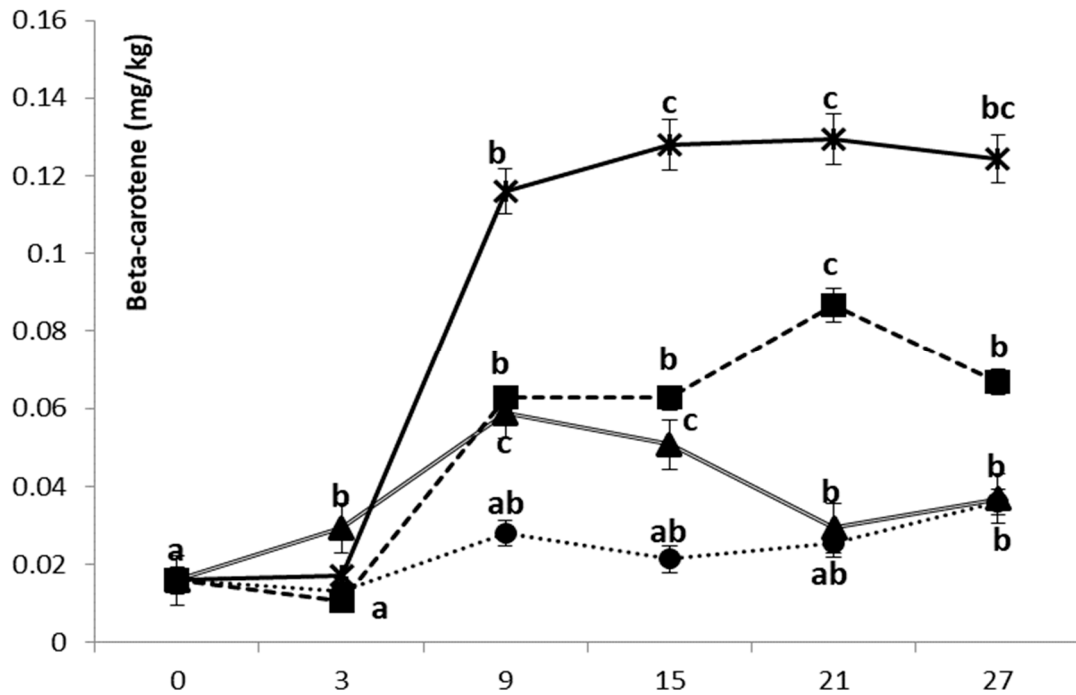

**Figure S5.** Time evolution (0–27 days) of yolk beta-carotene concentration according to the dietary treatments: control (●), experimental E1(■), experimental E2 (▲) and experimental E3 (×). C—control diet; E1—diet supplemented with 6% linseed meal + 2% dried kapia pepper; E2—diet supplemented with 6% linseed meal + 2% dried sea buckthorn pomace; E3—diet supplemented with 6% linseed meal + 2% dried carrot.

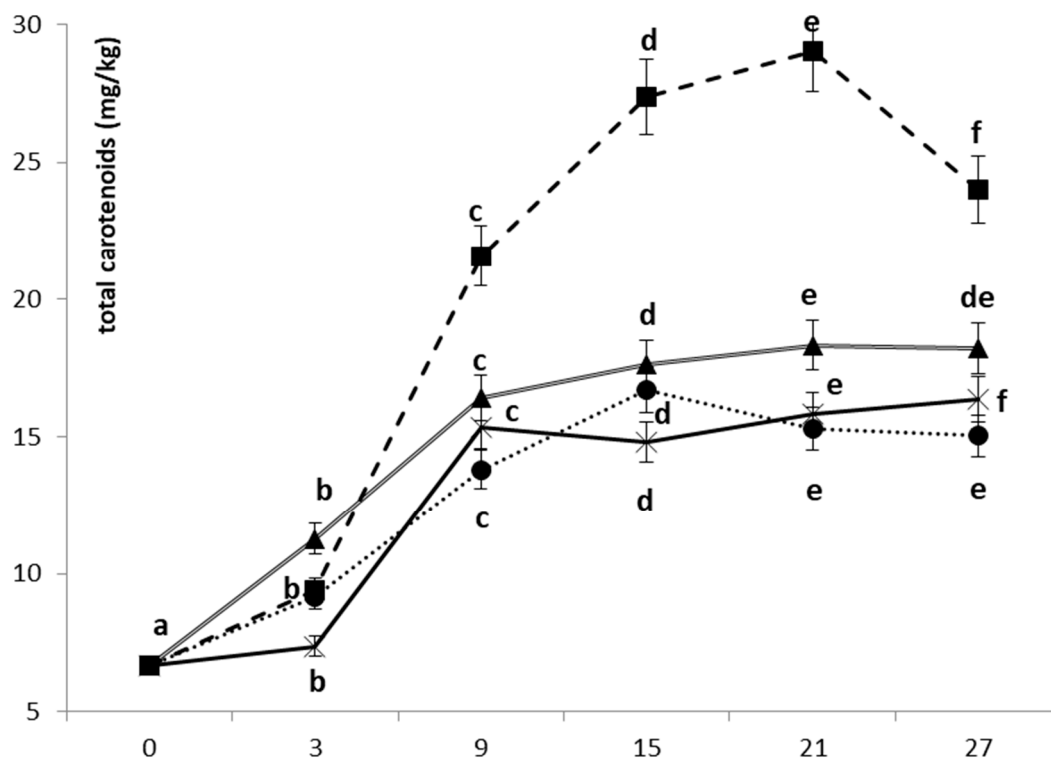

**Figure S6.** Time evolution (0–27 days) of yolk total carotenoids concentration according to the dietary treatments: control (●), experimental E1(■), experimental E2 (▲) and experimental E3 (×). C—control diet; E1—diet supplemented with 6% linseed meal + 2% dried kapia pepper; E2—diet supplemented with 6% linseed meal + 2% dried sea buckthorn pomace; E3—diet supplemented with 6% linseed meal + 2% dried carrot.
